# Supplementary material for: A Spatial Analysis of Hypertension Prevalence in Rural and Urban Malawi
Source: medRxiv preprint, doi:10.1101/2021.04.23.21255979, version 1 (2021-04-25)

# Supplementary materials

Figure 6. Kernel density plots showing the distribution of differences, dj, resulting from the unadjusted and adjusted analyses.


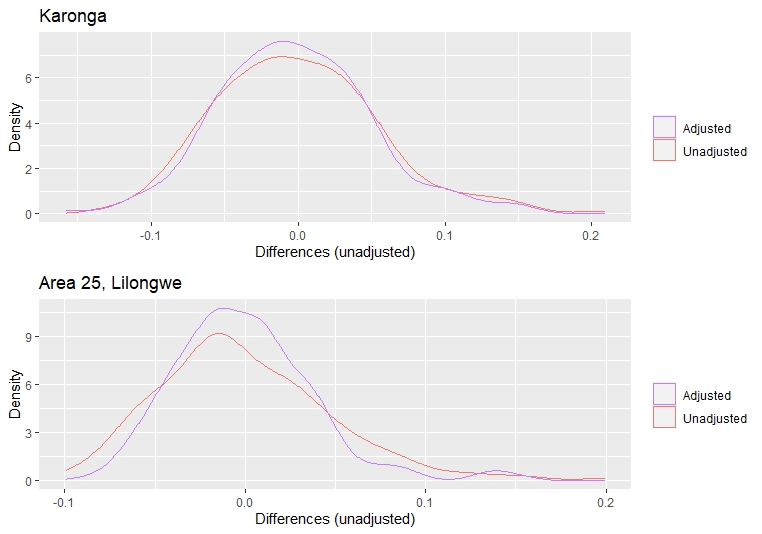

Supplement: Supplemental_figure [file 255979_file02.docx]
